# Supplementary material for: Fully inkjet-printed multilayered graphene-based flexible electrodes for repeatable electrochemical response
Source: Royal Society of Chemistry journal article supplement (doi:10.1039/d0ra04786d), 2020-01-01
Supplement: d0ra04786d1.pdf [file d0ra04786d1.pdf]

## Electronic Supplementary Material

### Fully Inkjet-Printed Multilayered Graphene-Based Flexible Electrodes for Electrochemical Performance

Twinkle Pandhi,<sup>1</sup> Casey Cornwell,<sup>2</sup> Kiyoo Fujimoto,<sup>1</sup> Pete Barnes,<sup>1</sup> Jasmine Cox,<sup>3</sup> Hui Xiong,<sup>1</sup> Paul H. Davis,<sup>1</sup> Harish Subbaraman,<sup>3</sup> Jessica E. Koehne,<sup>4</sup> and David Estrada<sup>1,5\*</sup>

<sup>1</sup>Micron School of Materials Science and Engineering, Boise State University, Boise, ID 83725-2090, United States

<sup>2</sup>Department of Chemistry, Northwest Nazarene University, Nampa, ID 83686, United States

<sup>3</sup>Department of Electrical and Computer Engineering, Boise State University, Boise, ID 83725, United States

<sup>4</sup>NASA Ames Research Center, Moffett Field, CA 94035, United States

<sup>5</sup>Center for Advanced Energy Studies, Boise State University, Boise, ID 83725-1012, United States

\* Corresponding Author: [daveestrada@boisestate.edu](mailto:daveestrada@boisestate.edu)

Figure S1

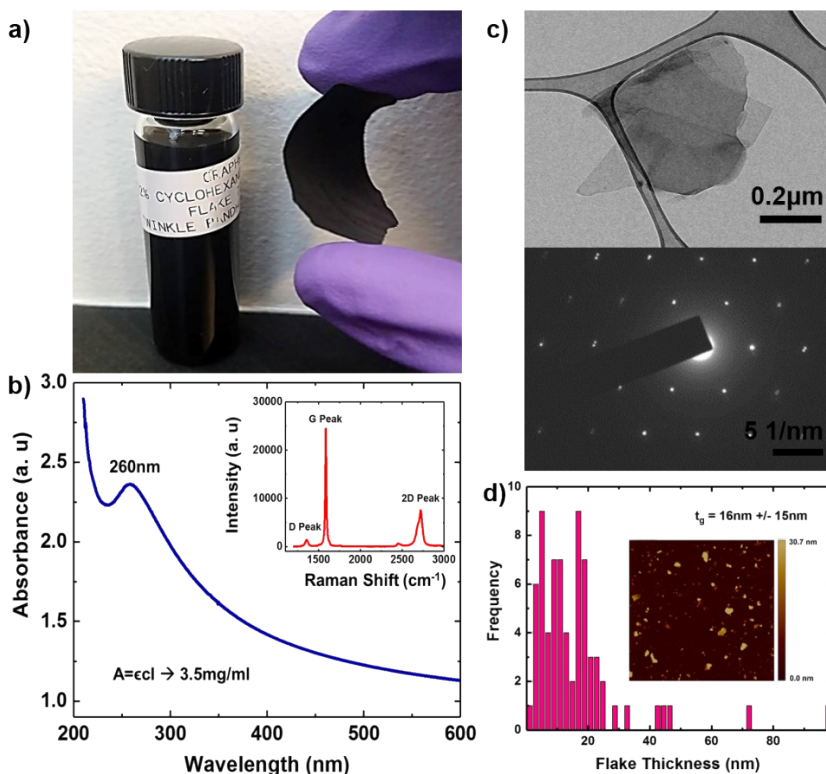

**Figure S1:** Graphene ink characterization **(a)** optical image graphene ink **(b)** UV-Visible absorption spectra and Raman spectra is seen (inset) for graphene/EC flakes on SiO<sub>2</sub> **(c)** TEM images and diffraction pattern of graphene flakes **(d)** AFM flake height distribution and (inset) AFM scanned image.

**Figure S2**

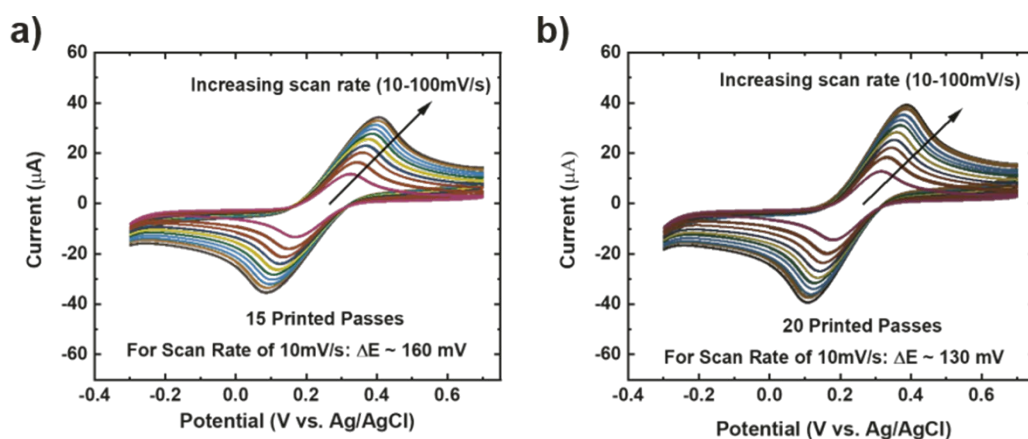

**Figure S2:** (a) 15 printed passes and (b) 20 printed passes cyclic voltammetry (CV) scans for 5 mM K<sub>3</sub>[Fe(CN)<sub>6</sub>] in 1 M KCl as the supporting electrolyte with increasing scan rate from 10 to 100 mV/s

Figure S3

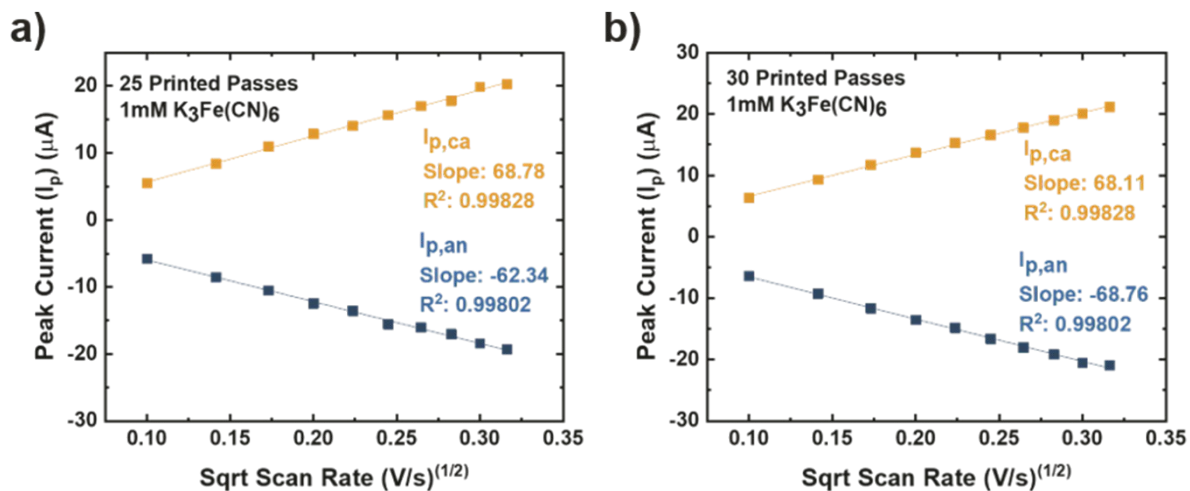

Figure S3: Extracted peak current ( $I_p$ ) versus square root of scan rate ( $(V/s)^{1/2}$ ) data from the CV measurements of (a) 25 printed passes and (b) 30 printed passes.

Figure S4

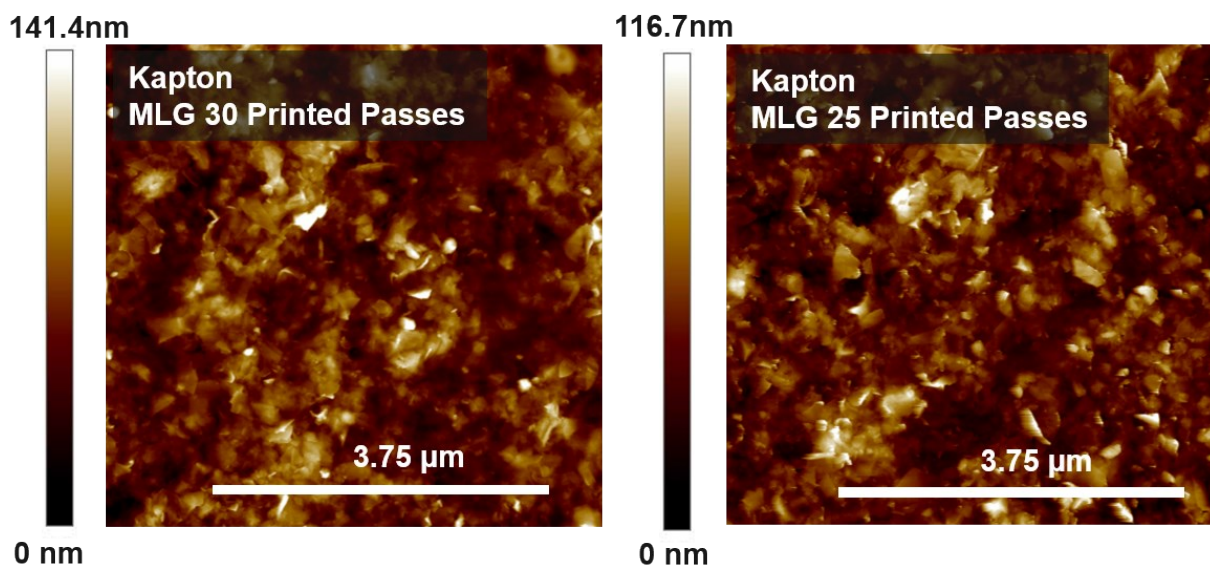

Figure S4: AFM scanned image of a) MLG 30 printed passes on Kapton and b) 25 printed passes on Kapton

**Figure S5**

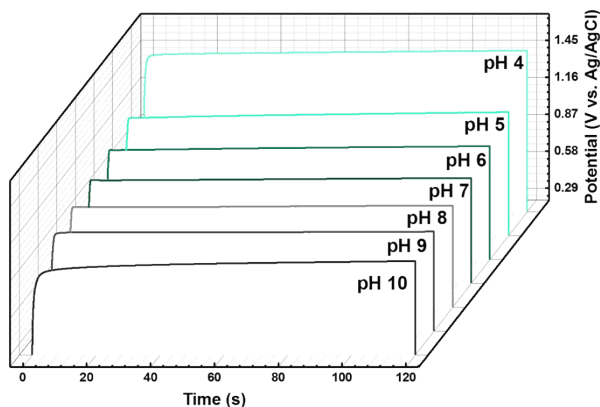

**Figure S5:** Raw static linear pH data vs. potential (potassium phosphate monobasic with sodium hydroxide commercial pH buffer solutions: 3-10 pH) using the 25 passes graphene printed electrode.

**Figure S6**

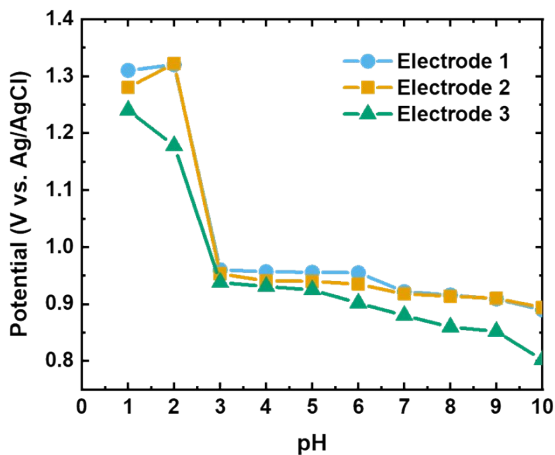

**Figure S6:** Static linear pH data vs. potential (potassium phosphate monobasic with sodium hydroxide commercial pH buffer solutions: 1-10 pH) using the 3 identical 25 passes graphene printed electrodes

**Supplementary Active Surface Area Calculations**

Using AFM analysis (below), we found the surface roughness of 25 printed passes and 30 printed passes.

1. **Surface Roughness Kapton:**  $R_a = 0.67 \pm 0.05$  nm  $R_q = 0.78 \pm 0.09$  nm
2. **Surface Roughness Inkjet-printed MLG 25 printed passes on Kapton:**  $R_a = 29.5 \pm 0.2$  nm  $R_q = 37.6 \pm 0.5$  nm and surface area difference 22.2%
3. **Surface Roughness Inkjet-printed MLG 30 printed passes on Kapton:**  $R_a = 27.4 \pm 0.2$  nm  $R_q = 35.6 \pm 0.5$  nm and surface area difference 20.8%

This suggests the overall area is 22.2% greater than the geometrical area. Similarly, for 30 print passes the overall area is 20.8% greater than the geometric area.

4. The electrochemical surface area was calculated by using Randles - Sevcik equation.  
$$I_p = 2.69 \times 10^5 \times n^{3/2} A D^{1/2} \nu^{1/2} C$$
  
1 mM  $K_3[Fe(CN)_6]$  with 1 M KCl as supporting electrolyte, at different sweep rates.  
At  $T = 298$  K, area of the electrode surface is signified as  $A$ , the diffusion coefficient as  $D$ , i.e.  $7.6 \times 10^{-6} \text{ cm}^2 \text{ s}^{-1}$ , sweep rate as  $\nu$ , and  $C$  is the concentration of  $K_3[Fe(CN)_6]$ .
5. From the slope of the cathodic current ( $68.78 \times 10^{-6}$  and  $68.11 \times 10^{-6}$  respectively) from the plots of  $I_p$  vs.  $\nu^{1/2}$  (25 and 30 printed passes (Supplementary Figure S2 a-b)).
6. The surface area of the O-ring was found to be  $0.07 \text{ cm}^2$  and the calculated electrochemical surface area was  $0.093 \text{ cm}^2$  (25 printed passes) and  $0.091 \text{ cm}^2$  (30 printed passes)
7. This simulation provided identical CV curves compared to the data for 25 and 30 printed passes respectively, as seen in Figures 3c-d.
8. Using the scan rate (10 mV/s) and electrochemical surface area of  $\sim 0.093 \text{ cm}^2$ , the cathodic diffusion coefficient extracted for  
25 printed passes are  $D = 4.17 \times 10^{-6} \text{ cm}^2/\text{s}$   
30 printed passes  $D = 6.38 \times 10^{-6} \text{ cm}^2/\text{s}$  for
9. The average electron transfer rate constants,  
(25 printed passes)  $k = 1.125 \times 10^{-2} \text{ cm/s}$  with average double layer capacitance of  $43.4 \mu\text{F}$  and  
(30 printed passes)  $k = 7.34 \times 10^{-3} \text{ cm/s}$  with average double layer capacitance of  $45.5 \mu\text{F}$ , where active surface area of  $\sim 0.093 \text{ cm}^2$  and  $\alpha = 0.5$  (shows symmetric electron transfer).

Figure S7

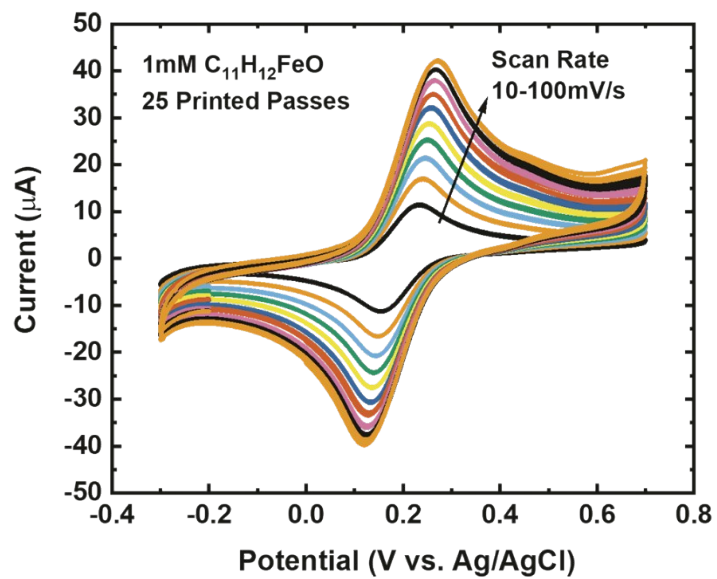

**Figure S7:** Graphene electrode cyclic voltammetry (CV) scan rate data for 1 mM C<sub>11</sub>H<sub>12</sub>FeO in 1M KCl as the supporting electrolyte with increasing scan rate 10mV/s-100mV/s for 25 printed passes of graphene.
